# Supplementary material
Source: publisher figshare collection journal article supplement (https://springernature.figshare.com/articles/dataset/_/7796111)
Supplement: Supplementary file [file 14509292]

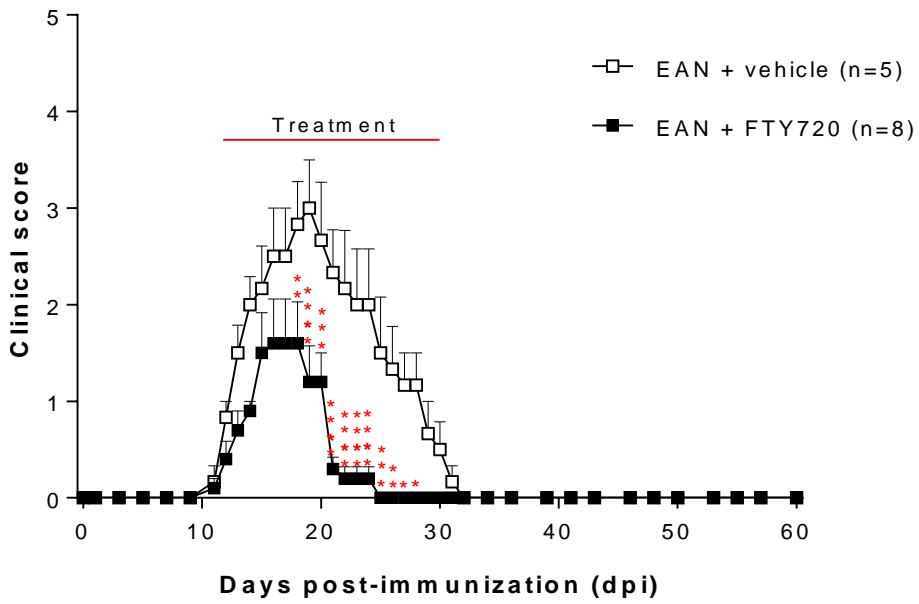

**Additional file 2: Figure S2**
